# Supplementary material for: The Impact of Different Drying Methods on the Metabolomic and Lipidomic Profiles of Arthrospira platensis
Source: MDPI journal article supplement (doi:10.3390/molecules29081747), 2024-04-12
Supplement: s1 [file s1]

# The Impact of Different Drying Methods on the Metabolomic and Lipidomic Profiles of *Arthrospira platensis*

Marika Mróz <sup>1</sup>, Karol Parchem <sup>1,2</sup>, Joanna Jóźwik <sup>1</sup>, M. Rosário Domingues <sup>3,4</sup> and Barbara Kusznerewicz <sup>1,\*</sup>

<sup>1</sup> Department of Chemistry, Technology and Biotechnology of Food, Faculty of Chemistry, Gdańsk University of Technology, 11/12 Narutowicza St., 80-233 Gdańsk, Poland; marika.mroz@pg.edu.pl (M.M.); karol.parchem@pg.edu.pl (K.P.); joanna.jozwik@pg.edu.pl (J.J.)

<sup>2</sup> Department of Analytical Chemistry, Faculty of Chemical Technology, University of Pardubice, Studentská 573, 532 10 Pardubice, Czech Republic

<sup>3</sup> Mass Spectrometry Centre, LAQV-REQUIMTE, Department of Chemistry, University of Aveiro, Santiago University Campus, 3810-193 Aveiro, Portugal; mrd@ua.pt

<sup>4</sup> Centre for Environmental and Marine Studies, CESAM, Department of Chemistry, University of Aveiro, Santiago University Campus, 3810-193 Aveiro, Portugal

\* Correspondence: barbara.kusznierewicz@pg.edu.pl

## Supplementary materials

**Table S1.** Retention time (Rt, min), proposed formula, theoretical  $m/z$  value of the precursor ion (Da), experimental  $m/z$  value of the precursor ion (Da), accuracy ( $\Delta m$ , ppm),  $m/z$  values of diagnostic fragment ions (Da) of compounds identified as pigments in spirulina extracts with the use of LC-Q-Orbitrap HRMS in positive ion mode.

| No | Rt [min] | Compound                                               | Formula                                                         | Theoretical [M+H] <sup>+</sup> | Experimental [M+H] <sup>+</sup> | $\Delta m$ [ppm] | MS/MS                                                         | CI |
|----|----------|--------------------------------------------------------|-----------------------------------------------------------------|--------------------------------|---------------------------------|------------------|---------------------------------------------------------------|----|
| 1  | 11.80    | Phycocyanobilin (I)                                    | C <sub>33</sub> H <sub>38</sub> N <sub>4</sub> O <sub>6</sub>   | 587.28696                      | 587.28626                       | -0.27            | 587.286; 299.139; 464.218                                     | P  |
| 2  | 13.03    | 15 <sup>1</sup> -OH-Lactone-pheophorbide <i>a</i> (I)  | C <sub>35</sub> H <sub>36</sub> N <sub>4</sub> O <sub>7</sub>   | 625.26623                      | 625.26546                       | 0.30             | 607.255; 547.234                                              | Ch |
| 3  | 13.31    | 13 <sup>2</sup> -OH-Pheophorbide <i>a</i> (I)          | C <sub>35</sub> H <sub>36</sub> N <sub>4</sub> O <sub>6</sub>   | 609.27131                      | 609.27054                       | -0.36            | 591.260; 519.237; 549.250                                     | Ch |
| 4  | 13.49    | 13 <sup>2</sup> -OH-Chlorophyllide <i>a</i>            | C <sub>35</sub> H <sub>34</sub> MgN <sub>4</sub> O <sub>6</sub> | 631.24071                      | 631.23963                       | -0.82            | -                                                             | Ch |
| 5  | 13.54    | Chlorophyllide <i>a</i>                                | C <sub>35</sub> H <sub>34</sub> MgN <sub>4</sub> O <sub>5</sub> | 615.24579                      | 615.24487                       | 0.60             | -                                                             | Ch |
| 6  | 13.56    | 13 <sup>2</sup> -OH-Pheophorbide <i>b</i>              | C <sub>35</sub> H <sub>34</sub> N <sub>4</sub> O <sub>7</sub>   | 623.25058                      | 623.24983                       | 0.30             | -                                                             | Ch |
| 7  | 14.06    | Pheophorbide <i>b</i>                                  | C <sub>35</sub> H <sub>34</sub> N <sub>4</sub> O <sub>6</sub>   | 607.25566                      | 607.25494                       | 0.30             | 547.234; 591.260                                              | Ch |
| 8  | 14.17    | 13 <sup>2</sup> -OH-Pheophorbide <i>a</i> (II)         | C <sub>35</sub> H <sub>36</sub> N <sub>4</sub> O <sub>6</sub>   | 609.27131                      | 609.27050                       | -0.43            | 591.259; 531.239; 559.234; 577.245; 549.251                   | Ch |
| 9  | 14.31    | 15 <sup>1</sup> -OH-Lactone-pheophorbide <i>a</i> (II) | C <sub>35</sub> H <sub>36</sub> N <sub>4</sub> O <sub>7</sub>   | 625.26623                      | 625.26552                       | 0.20             | 538.257; 565.244; 581.275; 566.249;                           | Ch |
| 10 | 14.53    | Adonirubin                                             | C <sub>40</sub> H <sub>52</sub> O <sub>3</sub>                  | 581.39947                      | 581.39902                       | 0.16             | 119.085; 145.101; 147.117; 563.387; 467.371                   | C  |
| 11 | 14.67    | Pheophorbide <i>a</i>                                  | C <sub>35</sub> H <sub>36</sub> N <sub>4</sub> O <sub>5</sub>   | 593.27640                      | 593.27561                       | -0.38            | 533.255; 565.282                                              | Ch |
| 12 | 14.77    | Chlorophyll <i>c</i>                                   | C <sub>35</sub> H <sub>32</sub> N <sub>4</sub> O <sub>5</sub>   | 589.24510                      | 589.24440                       | -0.24            | 529.224; 588.409; 591.257; 485.232; 277.215                   | Ch |
| 13 | 15.21    | Pyro-pheophorbide <i>b</i>                             | C <sub>35</sub> H <sub>32</sub> N <sub>4</sub> O <sub>4</sub>   | 549.25018                      | 549.24961                       | -0.01            | 521.254; 503.244; 476.220                                     | Ch |
| 14 | 15.24    | Diadinoxanthin (I)                                     | C <sub>40</sub> H <sub>54</sub> O <sub>3</sub>                  | 583.41512                      | 583.41459                       | 0.02             | 221.154; 165.0912; 119.086; 145.101; 565.401; 491.401         | C  |
| 15 | 15.38    | Myxoxanthophyll                                        | C <sub>46</sub> H <sub>66</sub> O <sub>7</sub>                  | 731.48868                      | 731.48580                       | -1.48            | 119.086; 145.101; 175.148; 71.049; 135.116; 525.372; 713.500  | C  |
| 16 | 15.39    | Diatoxanthin (I)                                       | C <sub>40</sub> H <sub>54</sub> O <sub>2</sub>                  | 567.42021                      | 567.41967                       | 0.02             | 119.086; 145.101; 133.101; 549.418; 475.359                   | C  |
| 17 | 15.81    | Phycocyanobilin (II)                                   | C <sub>33</sub> H <sub>38</sub> N <sub>4</sub> O <sub>6</sub>   | 587.28696                      | 587.28652                       | 0.32             | 587.286; 299.139; 464.218                                     | P  |
| 18 | 15.84    | Antheraxanthin (I)                                     | C <sub>40</sub> H <sub>56</sub> O <sub>3</sub>                  | 585.43077                      | 585.43022                       | -0.01            | 119.086; 175.148; 145.101; 133.101; 135.117; 567.426; 475.355 | C  |
| 19 | 15.87    | Pyro-pheophorbide <i>a</i>                             | C <sub>35</sub> H <sub>34</sub> N <sub>4</sub> O <sub>3</sub>   | 535.27091                      | 535.27032                       | -0.10            | 184.073; 136.062; 507.277; 190.159; 435.252;                  | Ch |
| 20 | 16.36    | Adonixanthin                                           | C <sub>40</sub> H <sub>54</sub> O <sub>3</sub>                  | 583.41512                      | 583.41451                       | -0.13            | 147.117; 119.086; 173.133; 145.101; 135.117; 565.401          | C  |
| 21 | 16.85    | Antheraxanthin (II)                                    | C <sub>40</sub> H <sub>56</sub> O <sub>3</sub>                  | 585.43077                      | 585.43023                       | 0.01             | 119.086; 175.148; 145.101; 133.101; 135.117; 567.426; 475.355 | C  |
| 22 | 16.99    | Diatoxanthin (II)                                      | C <sub>40</sub> H <sub>54</sub> O <sub>2</sub>                  | 567.42020                      | 567.41969                       | 0.07             | 119.086; 145.101; 133.101; 549.418                            | C  |
| 23 | 17.34    | Diadinoxanthin (II)                                    | C <sub>40</sub> H <sub>54</sub> O <sub>3</sub>                  | 583.41512                      | 583.41441                       | -0.20            | 119.086; 145.101; 135.117; 121.101; 175.148; 203.143; 565.401 | C  |
| 24 | 17.34    | Zeaxanthine                                            | C <sub>40</sub> H <sub>56</sub> O <sub>2</sub>                  | 569.43586                      | 569.43555                       | -0.54            | 119.086; 175.148; 135.117; 145.101; 477.366; 551.422          | C  |
| 25 | 17.35    | Vaucheriaxanthin                                       | C <sub>40</sub> H <sub>56</sub> O <sub>5</sub>                  | 617.42060                      | 617.41986                       | -0.40            | 121.101; 119.086; 145.101; 135.117; 599.409; 581.400; 557.399 | C  |
| 26 | 17.35    | Antheraxanthin (III)                                   | C <sub>40</sub> H <sub>56</sub> O <sub>3</sub>                  | 585.43077                      | 585.43007                       | -0.23            | 119.086; 145.101; 175.148; 135.117; 567.426; 549.412; 475.355 | C  |
| 27 | 18.28    | 3-OH-Echinone (I)                                      | C <sub>40</sub> H <sub>54</sub> O <sub>2</sub>                  | 567.42020                      | 567.41960                       | -0.09            | 203.143; 133.065; 119.086; 145.101; 175.148; 549.410          | C  |
| 28 | 18.29    | β-Apo-12'-carotenal                                    | C <sub>25</sub> H <sub>34</sub> O                               | 351.26879                      | 351.26889                       | 0.28             | 119.086; 105.070; 93.070; 69.071; 95.086; 107.086             | C  |
| 29 | 18.73    | β-Apo-10'-carotenal                                    | C <sub>27</sub> H <sub>36</sub> O                               | 377.28444                      | 377.28384                       | -0.15            | 119.086; 95.086; 105.070; 93.070; 81.070; 69.070; 133.101     | C  |
| 30 | 18.91    | Antheraxanthin (IV)                                    | C <sub>40</sub> H <sub>56</sub> O <sub>3</sub>                  | 585.43077                      | 585.43005                       | -0.22            | 145.101; 119.086; 175.148; 135.117; 567.426; 549.412; 475.355 | C  |
| 31 | 19.02    | Canthaxanthin                                          | C <sub>40</sub> H <sub>56</sub> O <sub>2</sub>                  | 565.40455                      | 565.40397                       | -0.07            | 203.143; 133.065; 365.662; 204.146; 119.086; 215.143; 548.417 | C  |
| 32 | 19.11    | 3-OH-Echinone (II)                                     | C <sub>40</sub> H <sub>54</sub> O <sub>2</sub>                  | 567.42020                      | 567.41967                       | 0.02             | 133.065; 203.143; 119.086; 145.101; 175.148; 549.410          | C  |
| 33 | 19.61    | 15 <sup>1</sup> -OH-Lactone pheophytin <i>b</i> (I)    | C <sub>35</sub> H <sub>72</sub> N <sub>4</sub> O <sub>8</sub>   | 917.54284                      | 917.54207                       | -0.24            | 639.245; 313.273; 873.552; 579.225                            | Ch |

|    |       |                                                       |                                                                 |           |            |       |                                                               |    |
|----|-------|-------------------------------------------------------|-----------------------------------------------------------------|-----------|------------|-------|---------------------------------------------------------------|----|
| 34 | 20.49 | $\beta$ -Apo-8'-karotenal                             | C <sub>30</sub> H <sub>40</sub> O                               | 417.31574 | 417.31511  | -0.19 | 119.086; 95.086; 107.086; 121.101; 105.070; 93.070; 69.070    | C  |
| 35 | 20.51 | 15 <sup>1</sup> -OH-Lactone-pheophytin <i>a</i> (I)   | C <sub>55</sub> H <sub>74</sub> N <sub>4</sub> O <sub>7</sub>   | 903.56358 | 903.56263  | -0.58 | 625.265; 885.549; 576.269                                     | Ch |
| 36 | 21.31 | Pheophytin <i>b</i> (I)                               | C <sub>55</sub> H <sub>72</sub> N <sub>4</sub> O <sub>6</sub>   | 885.55301 | 885.55214  | -0.37 | 593.275; 533.254; 867.545; 607.252                            | Ch |
| 37 | 21.37 | Chlorophyll <i>b</i>                                  | C <sub>55</sub> H <sub>70</sub> MgN <sub>4</sub> O <sub>6</sub> | 907.52241 | 907.52119  | -0.73 | -                                                             | Ch |
| 38 | 21.82 | 13 <sup>2</sup> -OH-Pheophytin <i>a</i> (I)           | C <sub>55</sub> H <sub>74</sub> N <sub>4</sub> O <sub>6</sub>   | 887.56866 | 887.56735  | -0.86 | 609.271; 313.274; 593.276; 549.249                            | Ch |
| 39 | 22.09 | OH-Chlorophyll <i>a</i> (I)                           | C <sub>55</sub> H <sub>72</sub> MgN <sub>4</sub> O <sub>6</sub> | 909.53806 | 909.53694  | -0.76 | 613.229; 891.527; 631.229                                     | Ch |
| 40 | 22.30 | Pheophytin <i>b</i> (II)                              | C <sub>55</sub> H <sub>72</sub> N <sub>4</sub> O <sub>6</sub>   | 885.55301 | 885.55220  | -0.30 | 575.266; 607.255; 867.540                                     | Ch |
| 41 | 22.60 | $\beta$ -Cryptoxanthin-5',6'-epoxide                  | C <sub>40</sub> H <sub>56</sub> O <sub>2</sub>                  | 569.43585 | 569.43526  | -0.08 | 205.159; 109.101; 121.101; 119.086; 145.101; 551.421          | C  |
| 42 | 22.66 | 13 <sup>2</sup> -OH-Pheophytin <i>a</i> (II)          | C <sub>55</sub> H <sub>74</sub> N <sub>4</sub> O <sub>6</sub>   | 887.56866 | 887.56764  | -0.53 | 591.259; 609.270; 869.557                                     | Ch |
| 43 | 22.67 | OH-Chlorophyll <i>a</i> (II)                          | C <sub>55</sub> H <sub>72</sub> MgN <sub>4</sub> O <sub>6</sub> | 909.53806 | 909.53712  | -0.44 | 613.229; 631.238; 891.525; 892.529                            | Ch |
| 44 | 22.70 | Divinyl chlorophyll <i>a</i> (I)                      | C <sub>55</sub> H <sub>70</sub> MgN <sub>4</sub> O <sub>5</sub> | 891.52749 | 891.52645  | -0.55 | 613.229; 553.207; 581.203                                     | Ch |
| 45 | 22.80 | 15 <sup>1</sup> -OH-Lactone chlorophyll <i>a</i>      | C <sub>55</sub> H <sub>72</sub> MgN <sub>4</sub> O <sub>7</sub> | 925.53297 | 925.53216  | -0.30 | 647.235; 838.524; 602.238; 560.226                            | Ch |
| 46 | 23.02 | Chlorophyll <i>a</i>                                  | C <sub>55</sub> H <sub>72</sub> MgN <sub>4</sub> O <sub>5</sub> | 893.54314 | 893.54223  | -0.42 | 615.244; 555.224; 583.219; 833.523                            | Ch |
| 47 | 23.03 | Pheophytin <i>a</i> (I)                               | C <sub>55</sub> H <sub>74</sub> N <sub>4</sub> O <sub>5</sub>   | 871.57375 | 871.57302  | -0.20 | 593.275; 533.255; 576.265                                     | Ch |
| 48 | 23.10 | 15 <sup>1</sup> -OH-Lactone-pheophytin <i>a</i> (II)  | C <sub>55</sub> H <sub>74</sub> N <sub>4</sub> O <sub>7</sub>   | 903.56358 | 903.56242  | -0.68 | 625.265; 607.255; 885.552                                     | Ch |
| 49 | 23.12 | OH-Chlorophyll <i>a</i> (III)                         | C <sub>55</sub> H <sub>72</sub> MgN <sub>4</sub> O <sub>6</sub> | 909.53806 | 909.53633  | -1.30 | 631.239; 613.229; 553.207; 598.201                            | Ch |
| 50 | 23.16 | Pheophytin <i>b</i> (III)                             | C <sub>55</sub> H <sub>72</sub> N <sub>4</sub> O <sub>6</sub>   | 885.55301 | 885.55193  | -0.60 | 607.254; 503.245; 592.264                                     | Ch |
| 51 | 23.17 | Pyro-chlorophyll <i>b</i>                             | C <sub>55</sub> H <sub>58</sub> MgN <sub>4</sub> O <sub>4</sub> | 849.51693 | 849.51601  | 0.40  | 571.219; 525.209; 821.520; 543.224                            | Ch |
| 52 | 23.20 | 13 <sup>2</sup> -OH-Pheophytin <i>a</i> (III)         | C <sub>55</sub> H <sub>74</sub> N <sub>4</sub> O <sub>6</sub>   | 887.56866 | 887.56739  | -0.79 | 591.259; 609.270                                              | Ch |
| 53 | 23.20 | 13 <sup>2</sup> -OH-Pheophytin <i>b</i>               | C <sub>55</sub> H <sub>72</sub> N <sub>4</sub> O <sub>7</sub>   | 901.54793 | 901.54707  | -0.24 | 623.250; 519.239; 563.229; 605.239; 536.241                   | Ch |
| 54 | 23.30 | Chlorophyll <i>b'</i>                                 | C <sub>55</sub> H <sub>70</sub> MgN <sub>4</sub> O <sub>6</sub> | 907.52241 | 907.52094  | -0.20 | 629.224; 586.229; 631.225; 628.236                            | Ch |
| 55 | 23.45 | Divinyl chlorophyll <i>a</i> (II)                     | C <sub>55</sub> H <sub>70</sub> MgN <sub>4</sub> O <sub>5</sub> | 891.52749 | 891.52577  | -1.28 | 613.228; 553.208; 631.239; 571.218                            | Ch |
| 56 | 23.53 | Echinonone                                            | C <sub>40</sub> H <sub>54</sub> O                               | 551.42529 | 551.42464  | -0.19 | 133.065; 203.143; 119.086; 121.101; 69.070; 185.133; 177.164  | C  |
| 57 | 23.57 | Pheophytin <i>a</i> (II)                              | C <sub>55</sub> H <sub>74</sub> N <sub>4</sub> O <sub>5</sub>   | 871.57375 | 871.57297  | -0.27 | 593.275; 533.254                                              | Ch |
| 58 | 23.58 | Chlorophyll <i>a'</i>                                 | C <sub>55</sub> H <sub>72</sub> MgN <sub>4</sub> O <sub>5</sub> | 893.54314 | 893.54212  | -0.56 | 615.243; 555.223; 583.217; 833.520                            | Ch |
| 59 | 23.61 | Pyro-chlorophyll <i>a</i> (I)                         | C <sub>55</sub> H <sub>70</sub> MgN <sub>4</sub> O <sub>3</sub> | 835.53766 | 835.53630  | 1.00  | 557.239; 313.273; 529.248; 575.503                            | Ch |
| 60 | 23.82 | 15 <sup>1</sup> -OH-Lactone-pheophorbide <i>b</i>     | C <sub>55</sub> H <sub>54</sub> N <sub>4</sub> O <sub>8</sub>   | 639.24549 | 639.24471  | 0.40  | -                                                             | Ch |
| 61 | 23.84 | 15 <sup>1</sup> -OH-Lactone pheophytin <i>b</i> (II)  | C <sub>55</sub> H <sub>72</sub> N <sub>4</sub> O <sub>8</sub>   | 917.54284 | 917.54135  | -0.71 | 639.245; 623.249; 589.208; 887.532                            | Ch |
| 62 | 24.14 | Pheophytin <i>b</i> (IV)                              | C <sub>55</sub> H <sub>72</sub> N <sub>4</sub> O <sub>6</sub>   | 885.55301 | 885.55160  | -0.60 | 607.254; 503.244; 591.259                                     | Ch |
| 63 | 24.29 | 13 <sup>2</sup> -OH-Pheophytin <i>a</i> (IV)          | C <sub>55</sub> H <sub>74</sub> N <sub>4</sub> O <sub>6</sub>   | 887.56866 | 887.56784  | -0.32 | 591.259; 609.271; 869.557; 531.237                            | Ch |
| 64 | 24.46 | 15 <sup>1</sup> -OH-Lactone-pheophytin <i>a</i> (III) | C <sub>55</sub> H <sub>74</sub> N <sub>4</sub> O <sub>7</sub>   | 903.56358 | 903.56272  | -0.33 | 625.265; 885.553; 537.249; 607.255                            | Ch |
| 65 | 24.81 | Pheophytin <i>a</i> (III)                             | C <sub>55</sub> H <sub>74</sub> N <sub>4</sub> O <sub>5</sub>   | 871.57375 | 871.57285  | -0.41 | 593.275; 533.254; 636.837                                     | Ch |
| 66 | 25.12 | Pheophytin <i>a</i> (IV)                              | C <sub>55</sub> H <sub>74</sub> N <sub>4</sub> O <sub>5</sub>   | 871.57375 | 871.57297  | -0.27 | 593.276; 533.254; 429.751                                     | Ch |
| 67 | 25.43 | Pyro-pheophytin <i>b</i>                              | C <sub>55</sub> H <sub>70</sub> N <sub>4</sub> O <sub>4</sub>   | 827.54753 | 827.54682  | -0.21 | 549.249; 503.243; 521.254; 799.549; 548.246                   | Ch |
| 68 | 25.91 | Pyro-pheophytin <i>a</i>                              | C <sub>55</sub> H <sub>72</sub> N <sub>4</sub> O <sub>3</sub>   | 813.56827 | 813.56732  | -0.49 | 535.269; 203.526                                              | Ch |
| 69 | 26.34 | $\beta$ -Carotene-5,6-epoxide                         | C <sub>40</sub> H <sub>56</sub> O                               | 553.44094 | 553.44039  | 0.13  | 119.086; 121.101; 145.101; 348.281; 177.164; 147.117; 535.426 | C  |
| 70 | 26.40 | $\beta$ -Carotene                                     | C <sub>40</sub> H <sub>56</sub>                                 | 536.43820 | 536.43763* | -1.07 | 119.086; 177.164; 121.101; 171.117; 444.375; 147.117;         | C  |
| 71 | 28.66 | Phytoene                                              | C <sub>40</sub> H <sub>54</sub>                                 | 545.50862 | 545.50819  | 0.20  | 81.070; 95.086; 109.101; 123.117; 69.071; 121.101; 149.133    | C  |

Classes: C, carotenoids and derivatives; Ch, chlorophylls and derivatives; P, phycocyanin. \* Molecular radical ion [M]\*\*.

**Table S2.** Retention time (Rt, min), proposed formula, theoretical *m/z* value of the precursor ion (Da), experimental *m/z* value of the precursor ion (Da), accuracy ( $\Delta m$ , ppm), *m/z* values of diagnostic fragment ions (Da) of compounds identified as sulfoquinovosyl diacylglycerols (SQDGs) and sulfoquinovosyl monoacylglycerols (SQMGs) in ethanolic spirulina extracts with the use of LC-Q-Orbitrap HRMS in negative ion mode.

| No | Rt [min] | Compound   | Formula                                           | Theoretical [M-H] | Experimental [M-H] | $\Delta m$ [ppm] | MS/MS             |
|----|----------|------------|---------------------------------------------------|-------------------|--------------------|------------------|-------------------|
| 72 | 12.23    | SQMG(18:3) | C <sub>27</sub> H <sub>46</sub> O <sub>11</sub> S | 577.2683          | 577.2695           | 2.03             | 225.007; 277.218; |
| 73 | 12.48    | SQMG(18:2) | C <sub>27</sub> H <sub>46</sub> O <sub>11</sub> S | 579.2839          | 579.2849           | 1.75             | 225.007; 279.232  |
| 74 | 12.7     | SQMG(16:0) | C <sub>25</sub> H <sub>46</sub> O <sub>11</sub> S | 555.2839          | 555.2848           | 1.62             | 225.007           |
| 75 | 12.82    | SQMG(18:1) | C <sub>27</sub> H <sub>46</sub> O <sub>11</sub> S | 581.2996          | 581.3004           | 1.38             | 225.007           |
| 76 | 13.37    | SQMG(18:0) | C <sub>27</sub> H <sub>46</sub> O <sub>11</sub> S | 583.3152          | 583.3162           | 1.71             | 225.007           |
| 77 | 16.42    | SQDG(30:1) | C <sub>39</sub> H <sub>72</sub> O <sub>12</sub> S | 763.4666          | 763.4678           | 1.54             | 255.233; 225.007; |
| 78 | 16.76    | SQDG(32:2) | C <sub>41</sub> H <sub>74</sub> O <sub>12</sub> S | 789.4822          | 789.4833           | 1.36             | 225.007           |
| 79 | 16.9     | SQDG(34:3) | C <sub>43</sub> H <sub>76</sub> O <sub>12</sub> S | 815.4979          | 815.4988           | 1.1              | 255.233           |
| 80 | 17.18    | SQDG(36:4) | C <sub>45</sub> H <sub>78</sub> O <sub>12</sub> S | 841.5136          | 841.5139           | 0.36             | 225.006           |
| 81 | 17.22    | SQDG(34:3) | C <sub>43</sub> H <sub>76</sub> O <sub>12</sub> S | 815.4979          | 815.4987           | 0.98             | 255.233           |
| 82 | 17.24    | SQDG(30:0) | C <sub>39</sub> H <sub>74</sub> O <sub>12</sub> S | 765.4823          | 765.483            | 0.88             | 225.008           |
| 83 | 17.44    | SQDG(32:1) | C <sub>41</sub> H <sub>76</sub> O <sub>12</sub> S | 791.4979          | 791.4988           | 1.11             | 225.007           |
| 84 | 17.66    | SQDG(34:2) | C <sub>43</sub> H <sub>78</sub> O <sub>12</sub> S | 817.5136          | 817.5145           | 1.1              | 225.008           |
| 85 | 18.07    | SQDG(36:3) | C <sub>45</sub> H <sub>80</sub> O <sub>12</sub> S | 843.5292          | 843.5301           | 1.07             | 255.233; 225.008  |
| 86 | 18.34    | SQDG(32:0) | C <sub>41</sub> H <sub>78</sub> O <sub>12</sub> S | 793.5136          | 793.5143           | 1.09             | 225.007           |
| 87 | 18.51    | SQDG(34:1) | C <sub>43</sub> H <sub>80</sub> O <sub>12</sub> S | 819.5292          | 819.5303           | 1.34             | 225.007           |
| 88 | 18.72    | SQDG(36:2) | C <sub>45</sub> H <sub>82</sub> O <sub>12</sub> S | 845.5449          | 845.5456           | 0.83             | 225.006           |
| 89 | 19.44    | SQDG(34:0) | C <sub>43</sub> H <sub>82</sub> O <sub>12</sub> S | 821.5449          | 821.5453           | 0.49             | 225.007           |
| 90 | 19.57    | SQDG(36:1) | C <sub>45</sub> H <sub>84</sub> O <sub>12</sub> S | 847.5605          | 847.5606           | 0.06             | 225.007           |
| 91 | 20.47    | SQDG(36:0) | C <sub>45</sub> H <sub>86</sub> O <sub>12</sub> S | 849.5762          | 849.5769           | 0.82             | 225.007           |

**Table S3.** Retention time (Rt, min), proposed formula, theoretical  $m/z$  value of the precursor ion (Da), experimental  $m/z$  value of the precursor ion (Da), accuracy ( $\Delta m$ , ppm),  $m/z$  values of diagnostic fragment ions (Da) of compounds identified as monogalactosyl diacylglycerol (MGDGs), monogalactosyl monoacylglycerol (MGMGs), digalactosyl diacylglycerols (DGDGs) and digalactosyl monoacylglycerols (DGMGs) in ethanolic spirulina extracts with the use of LC-Q-Orbitrap HRMS in positive ion mode.

| No  | Rt<br>[min] | Compound - Possible fatty acids | Formula                                         | Theoretical<br>[M+NH <sub>4</sub> ] <sup>+</sup> | Experimental<br>[M+NH <sub>4</sub> ] <sup>+</sup> | $\Delta m$<br>[ppm] | MS/MS                                                |
|-----|-------------|---------------------------------|-------------------------------------------------|--------------------------------------------------|---------------------------------------------------|---------------------|------------------------------------------------------|
| 92  | 13          | MGMG(16:2)                      | C <sub>25</sub> H <sub>46</sub> O <sub>9</sub>  | 506.3329                                         | 506.3322                                          | -1.41               | 309.242                                              |
| 93  | 13.06       | DGMG(16:1)                      | C <sub>31</sub> H <sub>56</sub> O <sub>14</sub> | 670.4014                                         | 670.4003                                          | -1.69               | 311.258                                              |
| 94  | 13.23       | DGMG(18:2)                      | C <sub>33</sub> H <sub>58</sub> O <sub>14</sub> | 696.417                                          | 696.4164                                          | -0.8                | 337.274                                              |
| 95  | 13.47       | DGMG(16:0) isomer 1             | C <sub>31</sub> H <sub>58</sub> O <sub>14</sub> | 672.417                                          | 672.4163                                          | -1.1                | 313.273                                              |
| 96  | 13.48       | MGMG(16:1)                      | C <sub>25</sub> H <sub>46</sub> O <sub>9</sub>  | 508.3486                                         | 508.3479                                          | -1.44               | 311.258                                              |
| 97  | 13.67       | DGMG(16:0) isomer 2             | C <sub>31</sub> H <sub>58</sub> O <sub>14</sub> | 672.417                                          | 672.4164                                          | -0.92               | 313.273                                              |
| 98  | 13.9        | MGMG(18:2)                      | C <sub>27</sub> H <sub>48</sub> O <sub>9</sub>  | 534.3642                                         | 534.3638                                          | -0.81               | 337.274                                              |
| 99  | 14.12       | MGMG(16:0)                      | C <sub>25</sub> H <sub>46</sub> O <sub>9</sub>  | 510.3642                                         | 510.3638                                          | -0.84               | 313.274                                              |
| 100 | 14.22       | MGMG(18:1)                      | C <sub>27</sub> H <sub>50</sub> O <sub>9</sub>  | 536.3799                                         | 536.3795                                          | -0.83               | 339.289                                              |
| 101 | 14.44       | MGMG(18:1)                      | C <sub>27</sub> H <sub>50</sub> O <sub>9</sub>  | 536.3799                                         | 536.3792                                          | -1.28               | 339.289                                              |
| 102 | 15.32       | MGMG(18:0)                      | C <sub>27</sub> H <sub>48</sub> O <sub>9</sub>  | 538.3955                                         | 538.3952                                          | -0.55               | 341.305                                              |
| 103 | 18.11       | DGDG(34:5)                      | C <sub>60</sub> H <sub>82</sub> O <sub>15</sub> | 928.5997                                         | 928.5986                                          | -1.18               | 309.242; 335.258; 569.456; 311.258                   |
| 104 | 18.39       | MGDG(34:6)                      | C <sub>63</sub> H <sub>70</sub> O <sub>10</sub> | 764.5313                                         | 764.5307                                          | -0.78               | 307.227; 309.242; 335.258; 333.242; 567.440; 379.284 |
| 105 | 18.74       | DGDG(36:6)                      | C <sub>63</sub> H <sub>84</sub> O <sub>15</sub> | 954.6154                                         | 954.6171                                          | 1.74                | 335.258; 595.473                                     |
| 106 | 18.84       | MGDG(32:4)                      | C <sub>61</sub> H <sub>70</sub> O <sub>10</sub> | 740.5313                                         | 740.5305                                          | -1.06               | 311.258; 309.242; 543.441; 335.258; 307.227          |
| 107 | 19          | DGDG(34:4)                      | C <sub>60</sub> H <sub>80</sub> O <sub>15</sub> | 930.6154                                         | 930.615                                           | -0.43               | 311.258; 335.258; 571.472                            |
| 108 | 19.19       | MGDG(34:5)                      | C <sub>63</sub> H <sub>72</sub> O <sub>10</sub> | 766.5469                                         | 766.546                                           | -1.15               | 309.242; 335.258; 569.456; 311.258                   |
| 109 | 19.34       | DGDG(36:5)                      | C <sub>63</sub> H <sub>86</sub> O <sub>15</sub> | 956.631                                          | 956.6309                                          | -0.08               | 337.274; 335.258; 597.488                            |
| 110 | 19.45       | MGDG(33:4)                      | C <sub>62</sub> H <sub>72</sub> O <sub>10</sub> | 754.5469                                         | 754.5463                                          | -0.76               | 311.258; 321.242; 557.457                            |
| 111 | 19.5        | DGDG(32:2)                      | C <sub>67</sub> H <sub>80</sub> O <sub>15</sub> | 906.6154                                         | 906.6144                                          | -1.06               | 313.274; 547.472; 309.242; 311.258                   |
| 112 | 19.54       | MGDG(32:3)                      | C <sub>61</sub> H <sub>72</sub> O <sub>10</sub> | 742.5469                                         | 742.5468                                          | -0.12               | 311.258; 309.242; 545.457                            |
| 113 | 19.67       | DGDG(34:3)                      | C <sub>60</sub> H <sub>80</sub> O <sub>15</sub> | 932.631                                          | 932.6301                                          | -0.94               | 573.487; 311.258; 337.273                            |
| 114 | 19.74       | MGDG(36:6)                      | C <sub>65</sub> H <sub>74</sub> O <sub>10</sub> | 792.5626                                         | 792.5626                                          | 0.03                | 335.258; 595.472; 337.274                            |
| 115 | 19.78       | MGDG(35:5)                      | C <sub>64</sub> H <sub>74</sub> O <sub>10</sub> | 780.5626                                         | 780.5619                                          | -0.91               | 323.258; 335.258; 583.472; 337.273                   |
| 116 | 19.83       | MGDG(32:3)                      | C <sub>61</sub> H <sub>72</sub> O <sub>10</sub> | 742.5469                                         | 742.5468                                          | -0.12               | 285.243; 545.457; 311.258; 309.242; 335.258          |
| 117 | 19.95       | DGDG(36:4)                      | C <sub>63</sub> H <sub>88</sub> O <sub>15</sub> | 958.6467                                         | 958.6465                                          | -0.16               | 337.274; 599.504; 339.289; 335.258;                  |
| 118 | 20.06       | MGDG(34:4)                      | C <sub>63</sub> H <sub>74</sub> O <sub>10</sub> | 768.5626                                         | 768.5621                                          | -0.61               | 311.258; 335.258; 571.472                            |
| 119 | 20.22       | MGDG(33:3)                      | C <sub>62</sub> H <sub>74</sub> O <sub>10</sub> | 756.5626                                         | 756.562                                           | -0.86               | 311.258; 559.472; 323.258                            |
| 120 | 20.37       | DGDG(32:1)                      | C <sub>67</sub> H <sub>80</sub> O <sub>15</sub> | 908.631                                          | 908.6307                                          | -0.29               | 549.488; 313.274; 311.258                            |
| 121 | 20.37       | MGDG(36:5)                      | C <sub>65</sub> H <sub>76</sub> O <sub>10</sub> | 794.5782                                         | 794.5775                                          | -0.94               | 337.274; 335.258; 597.488                            |
| 122 | 20.53       | MGDG(33:3)                      | C <sub>62</sub> H <sub>74</sub> O <sub>10</sub> | 756.5626                                         | 756.5621                                          | -0.7                | 313.273; 321.242; 559.472                            |
| 123 | 20.58       | MGDG(32:2)                      | C <sub>61</sub> H <sub>74</sub> O <sub>10</sub> | 744.5626                                         | 744.5624                                          | -0.3                | 547.472; 311.258; 313.274; 285.242; 309.243; 337.274 |
| 124 | 20.64       | MGDG(35:4)                      | C <sub>64</sub> H <sub>76</sub> O <sub>10</sub> | 782.5782                                         | 782.5775                                          | -0.88               | 325.274; 335.258; 585.488; 311.258                   |
| 125 | 20.67       | DGDG(34:2)                      | C <sub>60</sub> H <sub>80</sub> O <sub>15</sub> | 934.6467                                         | 934.6455                                          | -1.27               | 313.274; 575.503; 337.273                            |
| 126 | 20.75       | MGDG(34:3)                      | C <sub>63</sub> H <sub>76</sub> O <sub>10</sub> | 770.5782                                         | 770.5779                                          | -0.33               | 311.258; 573.488; 337.274                            |
| 127 | 20.85       | MGDG(32:1)                      | C <sub>61</sub> H <sub>76</sub> O <sub>10</sub> | 746.5782                                         | 746.5781                                          | -0.18               | 313.273; 549.487; 311.258                            |
| 128 | 20.95       | DGDG(36:3)                      | C <sub>63</sub> H <sub>86</sub> O <sub>15</sub> | 960.6623                                         | 960.6613                                          | -1.04               | 313.274; 601.519; 363.289                            |
| 129 | 20.96       | MGDG(36:4)                      | C <sub>65</sub> H <sub>78</sub> O <sub>10</sub> | 796.5939                                         | 796.593                                           | -1.18               | 337.274; 599.503; 311.258; 313.274; 335.258; 363.289 |
| 130 | 21.09       | MGDG(34:3)                      | C <sub>63</sub> H <sub>76</sub> O <sub>10</sub> | 770.5782                                         | 770.578                                           | -0.26               | 313.274; 335.258; 573.488                            |
| 131 | 21.19       | MGDG(33:2)                      | C <sub>62</sub> H <sub>76</sub> O <sub>10</sub> | 758.5782                                         | 758.5781                                          | -0.1                | 313.274; 561.488; 323.258                            |
| 132 | 21.24       | MGDG(36:4)                      | C <sub>65</sub> H <sub>80</sub> O <sub>10</sub> | 796.5939                                         | 796.5935                                          | -0.5                | 339.289; 335.258; 599.504; 311.258; 363.289; 337.274 |
| 133 | 21.31       | MGDG(35:3)                      | C <sub>64</sub> H <sub>78</sub> O <sub>10</sub> | 784.5939                                         | 784.5934                                          | -0.58               | 587.504; 337.274; 311.258; 351.290; 327.289          |
| 134 | 21.37       | DGDG(32:0)                      | C <sub>67</sub> H <sub>88</sub> O <sub>15</sub> | 910.6467                                         | 910.6464                                          | -0.37               | 313.274; 551.504                                     |
| 135 | 21.41       | MGDG(32:1)                      | C <sub>61</sub> H <sub>76</sub> O <sub>10</sub> | 746.5782                                         | 746.5773                                          | -1.24               | 313.274; 549.488; 311.258; 337.273                   |
| 136 | 21.49       | DGDG(34:1)                      | C <sub>60</sub> H <sub>80</sub> O <sub>15</sub> | 936.6623                                         | 936.662                                           | -0.32               | 577.519; 313.274; 339.290                            |
| 137 | 21.69       | MGDG(34:2)                      | C <sub>63</sub> H <sub>78</sub> O <sub>10</sub> | 772.5939                                         | 772.5933                                          | -0.75               | 313.274; 575.503; 337.274                            |
| 138 | 21.74       | DGDG(36:2)                      | C <sub>63</sub> H <sub>92</sub> O <sub>15</sub> | 962.678                                          | 962.6766                                          | -1.48               | 313.274; 603.534; 365.305                            |
| 139 | 21.98       | MGDG(33:1)                      | C <sub>62</sub> H <sub>78</sub> O <sub>10</sub> | 760.5939                                         | 760.5933                                          | -0.84               | 313.273; 563.503; 325.274                            |
| 140 | 22.17       | MGDG(35:2)                      | C <sub>64</sub> H <sub>80</sub> O <sub>10</sub> | 786.6095                                         | 786.6094                                          | -0.16               | 589.519; 313.274; 351.289; 311.258                   |
| 141 | 22.36       | MGDG(32:0)                      | C <sub>61</sub> H <sub>78</sub> O <sub>10</sub> | 748.5939                                         | 748.5937                                          | -0.28               | 313.274; 551.504                                     |
| 142 | 22.49       | MGDG(34:1)                      | C <sub>63</sub> H <sub>80</sub> O <sub>10</sub> | 774.6095                                         | 774.609                                           | -0.63               | 313.274; 577.519; 339.289                            |
| 143 | 22.65       | MGDG(36:2)                      | C <sub>65</sub> H <sub>82</sub> O <sub>10</sub> | 800.6252                                         | 800.6249                                          | -0.4                | 313.274; 603.535; 365.305; 341.305; 337.274          |
| 144 | 22.99       | MGDG(35:1)                      | C <sub>64</sub> H <sub>82</sub> O <sub>10</sub> | 788.6252                                         | 788.6246                                          | -0.72               | 313.273; 591.535; 353.305; 327.289                   |
| 145 | 23.41       | MGDG(34:0)                      | C <sub>63</sub> H <sub>82</sub> O <sub>10</sub> | 776.6252                                         | 776.6238                                          | -1.75               | 579.534; 313.273; 341.305                            |
| 146 | 23.48       | MGDG(36:1)                      | C <sub>65</sub> H <sub>84</sub> O <sub>10</sub> | 802.6408                                         | 802.6396                                          | -1.43               | 605.550; 341.305; 339.289; 313.273; 367.320          |
| 147 | 24.23       | MGDG(36:0)                      | C <sub>65</sub> H <sub>86</sub> O <sub>10</sub> | 804.6565                                         | 804.6562                                          | -0.39               | 607.566; 313.274; 369.336; 341.305                   |

**Table S4.** Retention time (Rt, min), proposed formula, theoretical  $m/z$  value of the precursor ion (Da), experimental  $m/z$  value of the precursor ion (Da), accuracy ( $\Delta m$ , ppm),  $m/z$  values of diagnostic fragment ions (Da) of compounds identified as phosphatidylglycerols (PGs), and lysophosphatidylglycerols (LPGs) in ethanolic spirulina extracts with the use of LC-Q-Orbitrap HRMS in negative ion mode.

| No  | Rt<br>[min] | Compound           | Formula                                           | Theoretical<br>[M-H] <sup>-</sup> | Experimental<br>[M-H] <sup>-</sup> | $\Delta m$<br>[ppm] | MS/MS                                                |
|-----|-------------|--------------------|---------------------------------------------------|-----------------------------------|------------------------------------|---------------------|------------------------------------------------------|
| 148 | 12.5        | LPG(18:3)          | C <sub>24</sub> H <sub>43</sub> O <sub>9</sub> P  | 505.2566                          | 505.2575                           | 1.86                | 277.217; 152.994; 227.032; 245.042; 171.005          |
| 149 | 12.77       | LPG(18:2)          | C <sub>24</sub> H <sub>45</sub> O <sub>9</sub> P  | 507.2723                          | 507.273                            | 1.4                 | 279.233; 152.9951; 227.0321; 245.043; 171.005        |
| 150 | 13.08       | LPG(16:0) isomer 1 | C <sub>22</sub> H <sub>39</sub> O <sub>9</sub> P  | 483.2723                          | 483.2722                           | -0.3                | 255.232; 152.994; 227.032; 171.006; 245.044          |
| 151 | 13.23       | LPG(18:1)          | C <sub>24</sub> H <sub>47</sub> O <sub>9</sub> P  | 509.2879                          | 509.2876                           | -0.65               | 281.248; 152.994; 227.032; 245.042                   |
| 152 | 13.83       | LPG(16:0) isomer 2 | C <sub>22</sub> H <sub>41</sub> O <sub>9</sub> P  | 483.2723                          | 483.2728                           | 0.96                | 255.233; 152.995; 227.032                            |
| 153 | 13.94       | LPG(18:0)          | C <sub>24</sub> H <sub>49</sub> O <sub>9</sub> P  | 511.3036                          | 511.3037                           | 0.16                | 283.264; 152.994; 227.032; 171.005                   |
| 154 | 17.74       | PG(36:5)           | C <sub>42</sub> H <sub>73</sub> O <sub>10</sub> P | 767.4863                          | 767.4869                           | 0.83                | 277.217; 279.233; 152.995                            |
| 155 | 17.93       | PG(32:2)           | C <sub>38</sub> H <sub>71</sub> O <sub>10</sub> P | 717.4707                          | 717.4703                           | -0.51               | 255.232; 251.201; 253.217; 152.994                   |
| 156 | 18.41       | PG(36:4)           | C <sub>42</sub> H <sub>75</sub> O <sub>10</sub> P | 769.502                           | 769.5032                           | 1.6                 | 279.233; 251.202; 253.217; 277.217; 489.260; 152.995 |
| 157 | 18.68       | PG(32:2)           | C <sub>38</sub> H <sub>73</sub> O <sub>10</sub> P | 717.4707                          | 717.4716                           | 1.2                 | 255.233; 227.201; 251.201; 152.995; 279.233; 253.217 |
| 158 | 18.75       | PG(34:3)           | C <sub>40</sub> H <sub>73</sub> O <sub>10</sub> P | 743.4863                          | 743.4873                           | 1.35                | 253.217; 279.233; 152.995; 507.273; 489.265          |
| 159 | 19.09       | PG(36:4)           | C <sub>42</sub> H <sub>75</sub> O <sub>10</sub> P | 769.502                           | 769.5063                           | 5.57                | 279.233; 251.201; 253.217; 152.995                   |
| 160 | 19.15       | PG(34:2)           | C <sub>40</sub> H <sub>75</sub> O <sub>10</sub> P | 745.502                           | 745.503                            | 1.33                | 279.233; 255.233; 152.995; 489.262; 465.262          |
| 161 | 19.32       | PG(33:2)           | C <sub>39</sub> H <sub>73</sub> O <sub>10</sub> P | 731.4863                          | 731.4874                           | 1.46                | 255.232; 152.995; 493.257                            |
| 162 | 19.4        | PG(35:3)           | C <sub>41</sub> H <sub>75</sub> O <sub>10</sub> P | 757.502                           | 757.5029                           | 1.15                | 267.233; 279.233; 507.270; 253.218                   |
| 163 | 19.66       | PG(32:0)           | C <sub>38</sub> H <sub>75</sub> O <sub>10</sub> P | 721.502                           | 721.5013                           | -0.1                | 255.232; 152.994; 465.260; 483.273                   |
| 164 | 19.75       | PG(34:2)           | C <sub>40</sub> H <sub>75</sub> O <sub>10</sub> P | 745.502                           | 745.503                            | 1.33                | 255.233; 279.233; 152.995; 507.272; 489.262          |
| 165 | 19.88       | PG(32:0)           | C <sub>38</sub> H <sub>75</sub> O <sub>10</sub> P | 721.502                           | 721.5014                           | -0.83               | 255.232; 465.261; 152.994; 483.275                   |
| 166 | 20.31       | PG(33:1)           | C <sub>39</sub> H <sub>75</sub> O <sub>10</sub> P | 733.502                           | 733.5035                           | 2.02                | 255.233; 267.233; 152.995; 495.274                   |
| 167 | 20.31       | PG(36:3)           | C <sub>42</sub> H <sub>77</sub> O <sub>10</sub> P | 771.5176                          | 771.5184                           | 1                   | 255.233; 281.249; 152.995; 279.233; 251.201          |
| 168 | 20.67       | PG(34:2)           | C <sub>40</sub> H <sub>75</sub> O <sub>10</sub> P | 745.502                           | 745.5032                           | 1.57                | 255.233; 279.233; 152.995; 507.272; 489.262          |
| 169 | 20.69       | PG(35:2)           | C <sub>41</sub> H <sub>77</sub> O <sub>10</sub> P | 759.5176                          | 759.5189                           | 1.74                | 269.249; 255.233; 279.233; 152.995; 293.249          |
| 170 | 20.81       | PG(32:0)           | C <sub>38</sub> H <sub>75</sub> O <sub>10</sub> P | 721.502                           | 721.5015                           | -0.66               | 255.232; 152.995; 465.262; 483.272; 171.005          |
| 171 | 20.97       | PG(34:1)           | C <sub>40</sub> H <sub>77</sub> O <sub>10</sub> P | 747.5176                          | 747.5189                           | 1.77                | 255.233; 281.249; 152.995; 491.277                   |
| 172 | 21.02       | PG(36:2)           | C <sub>42</sub> H <sub>79</sub> O <sub>10</sub> P | 773.5333                          | 773.5367                           | 4.45                | 281.249; 255.233; 152.995; 253.217; 509.292; 491.277 |
| 173 | 21.03       | PG(32:0)           | C <sub>38</sub> H <sub>75</sub> O <sub>10</sub> P | 721.502                           | 721.5037                           | 2.301               | 255.233; 152.995; 465.262; 483.272; 171.005          |
| 174 | 21.27       | PG(34:1)           | C <sub>40</sub> H <sub>77</sub> O <sub>10</sub> P | 747.5176                          | 747.5183                           | 0.95                | 255.233; 281.248; 152.995; 509.287                   |
| 175 | 21.31       | PG(36:2)           | C <sub>42</sub> H <sub>79</sub> O <sub>10</sub> P | 773.5333                          | 773.5345                           | 1.53                | 255.233; 281.249; 307.264; 152.995; 283.264          |
| 176 | 21.72       | PG(35:1)           | C <sub>41</sub> H <sub>79</sub> O <sub>10</sub> P | 761.5333                          | 761.5347                           | 1.8                 | 255.233; 295.264; 152.995; 269.248                   |
| 177 | 22.2        | PG(34:0)           | C <sub>40</sub> H <sub>79</sub> O <sub>10</sub> P | 749.5333                          | 749.5321                           | -1.59               | 255.233; 283.264; 152.995; 493.295                   |
| 178 | 22.45       | PG(34:0)           | C <sub>40</sub> H <sub>79</sub> O <sub>10</sub> P | 749.5333                          | 749.5344                           | 1.42                | 255.232; 283.264; 152.995; 511.304; 493.293          |
| 179 | 23.95       | PG(36:0)           | C <sub>42</sub> H <sub>83</sub> O <sub>10</sub> P | 777.5646                          | 777.5656                           | 1.22                | 255.233; 311.296; 152.995; 283.263; 539.336          |
| 180 | 25.99       | PG(34:2)           | C <sub>40</sub> H <sub>75</sub> O <sub>10</sub> P | 745.502                           | 745.5034                           | 1.82                | 255.233; 279.233; 152.995; 507.273; 489.261          |

**Table S5.** Retention time (Rt, min), proposed formula, theoretical  $m/z$  value of the precursor ion (Da), experimental  $m/z$  value of the precursor ion (Da), accuracy ( $\Delta m$ , ppm),  $m/z$  values of diagnostic fragment ions (Da) of compounds identified as phosphatidylcholines (PCs), lysophosphatidylcholines (LPCs) and phosphatidylethanolamines (PEs) in ethanolic spirulina extracts with the use of LC-Q-Orbitrap HRMS in positive ion mode.

| No  | Rt<br>[min] | Compound  | Formula                                           | Theoretical<br>[M+H] <sup>+</sup> | Experimental<br>[M+H] <sup>+</sup> | $\Delta m$<br>[ppm] | MS/MS   |
|-----|-------------|-----------|---------------------------------------------------|-----------------------------------|------------------------------------|---------------------|---------|
| 181 | 14.58       | LPC(18:1) | C <sub>26</sub> H <sub>52</sub> NO <sub>7</sub> P | 522.356                           | 522.3555                           | -1.02               | 184.073 |
| 182 | 21.19       | PC(34:2)  | C <sub>42</sub> H <sub>80</sub> NO <sub>8</sub> P | 758.57                            | 758.5781                           | 10.73               | 184.073 |
| 183 | 21.7        | PC(36:2)  | C <sub>44</sub> H <sub>84</sub> NO <sub>8</sub> P | 786.6013                          | 786.6083                           | 8.89                | 184.073 |
| 184 | 22.47       | PC(37:2)  | C <sub>45</sub> H <sub>88</sub> NO <sub>8</sub> P | 800.6169                          | 800.6235                           | 8.29                | 184.073 |
| 185 | 22.86       | PE(36:2)  | C <sub>41</sub> H <sub>78</sub> NO <sub>8</sub> P | 744.5543                          | 744.5538                           | -0.63               | 603.534 |

**Table S6.** Retention time (Rt, min), proposed formula, theoretical  $m/z$  value of the precursor ion (Da), experimental  $m/z$  value of the precursor ion (Da), accuracy ( $\Delta m$ , ppm),  $m/z$  values of diagnostic fragment ions (Da) of compounds identified as ceramide phosphoinositols (PI-Cers) in ethanolic spirulina extracts with the use of LC-Q-Orbitrap HRMS in negative ion mode.

| No  | Rt<br>[min] | Compound           | Formula                                            | Theoretical<br>[M-H] <sup>-</sup> | Experimental<br>[M-H] <sup>-</sup> | $\Delta m$<br>[ppm] | MS/MS            |
|-----|-------------|--------------------|----------------------------------------------------|-----------------------------------|------------------------------------|---------------------|------------------|
| 186 | 17.12       | PI-Cer(t18:0/16:0) | C <sub>40</sub> H <sub>80</sub> NO <sub>12</sub> P | 796.534                           | 796.5329                           | -1.38               | 241.011; 259.021 |
| 187 | 17.38       | PI-Cer(t19:0/16:0) | C <sub>41</sub> H <sub>82</sub> NO <sub>12</sub> P | 810.5496                          | 810.5483                           | -1.63               | 241.011; 259.021 |
| 188 | 17.84       | PI-Cer(t18:0/18:0) | C <sub>42</sub> H <sub>84</sub> NO <sub>12</sub> P | 824.5653                          | 824.5635                           | -2.21               | 241.011; 259.022 |

**Table S7.** Retention time (Rt, min), proposed formula, theoretical mass of the parent ion (Da), experimental mass of the parent ion (Da), accuracy ( $\Delta m$ , ppm), m/z values of diagnostic mass fragments (Da) of compounds tentatively identified as triacylglycerols (TGs) and diacylglycerols (DGs) in spirulina extracts with the use of LC-Q-Orbitrap HRMS in positive ion mode.

| No  | Rt<br>[min] | Compound - Possible fatty acids | Formula                                         | Theoretical<br>[M+NH <sub>4</sub> ] <sup>+</sup> | Experimental<br>[M+NH <sub>4</sub> ] <sup>+</sup> | $\Delta m$<br>[ppm] | MS/MS                                                                  |
|-----|-------------|---------------------------------|-------------------------------------------------|--------------------------------------------------|---------------------------------------------------|---------------------|------------------------------------------------------------------------|
| 189 | 18.21       | DG(34:2)                        | C <sub>37</sub> H <sub>68</sub> O <sub>5</sub>  | 610.541                                          | 610.5404                                          | -0.97               | 313.274; 337.273                                                       |
| 190 | 20.16       | DG(34:4)                        | C <sub>37</sub> H <sub>64</sub> O <sub>5</sub>  | 606.5097                                         | 606.509                                           | -1.2                | 311.258; 335.258                                                       |
| 191 | 21.13       | DG(34:3)                        | C <sub>37</sub> H <sub>66</sub> O <sub>5</sub>  | 608.5254                                         | 608.5243                                          | -1.82               | 313.274; 335.258                                                       |
| 192 | 21.69       | DG(34:2)                        | C <sub>37</sub> H <sub>68</sub> O <sub>5</sub>  | 610.541                                          | 610.5406                                          | -0.67               | 313.274; 337.274                                                       |
| 193 | 22.28       | DG(34:3)                        | C <sub>37</sub> H <sub>66</sub> O <sub>5</sub>  | 608.5254                                         | 608.5247                                          | -1.12               | 311.258; 313.273; 337.273; 335.258                                     |
| 194 | 22.59       | DG(34:3)                        | C <sub>37</sub> H <sub>66</sub> O <sub>5</sub>  | 608.5254                                         | 608.5246                                          | -1.32               | 313.274; 335.258                                                       |
| 195 | 23.16       | DG(34:2)                        | C <sub>37</sub> H <sub>68</sub> O <sub>5</sub>  | 610.541                                          | 610.54                                            | -1.57               | 313.273; 337.273                                                       |
| 196 | 23.52       | TG(34:1)                        | C <sub>37</sub> H <sub>66</sub> O <sub>6</sub>  | 626.536                                          | 626.5356                                          | -0.57               | 327.253; 521.457; 409.331; 353.268; 381.300; 355.284; 328.256; 493.425 |
| 197 | 23.73       | DG(32:0)                        | C <sub>35</sub> H <sub>68</sub> O <sub>5</sub>  | 586.541                                          | 586.5406                                          | -0.7                | 313.274                                                                |
| 198 | 23.86       | DG(34:1)                        | C <sub>37</sub> H <sub>70</sub> O <sub>5</sub>  | 612.5567                                         | 612.5561                                          | -0.99               | 313.273; 339.289                                                       |
| 199 | 24.3        | TG(34:0)                        | C <sub>37</sub> H <sub>70</sub> O <sub>6</sub>  | 628.5516                                         | 628.551                                           | -0.91               | 355.284; 383.315; 523.472; 327.253; 411.347                            |
| 200 | 24.35       | TG(36:1)                        | C <sub>39</sub> H <sub>72</sub> O <sub>6</sub>  | 654.5673                                         | 654.5667                                          | -0.9                | 355.284; 409.331; 549.488; 381.300; 521.456; 383.316; 437.362          |
| 201 | 24.59       | TG(38:2)                        | C <sub>41</sub> H <sub>76</sub> O <sub>6</sub>  | 680.5829                                         | 680.582                                           | -1.28               | 381.300; 575.503; 383.316; 407.316; 409.331                            |
| 202 | 24.66       | TG(34:0)                        | C <sub>37</sub> H <sub>70</sub> O <sub>6</sub>  | 628.5516                                         | 628.5514                                          | -0.33               | 355.284; 383.315; 523.472; 411.347; 327.253; 495.441                   |
| 203 | 24.98       | TG(34:0)                        | C <sub>37</sub> H <sub>70</sub> O <sub>6</sub>  | 628.5516                                         | 628.5511                                          | -0.72               | 355.284; 383.315; 523.472; 411.347; 495.441; 327.253                   |
| 204 | 25.01       | TG(36:0)                        | C <sub>39</sub> H <sub>74</sub> O <sub>6</sub>  | 656.5829                                         | 656.5825                                          | -0.67               | 383.315; 551.504; 355.284; 411.347; 523.472                            |
| 205 | 25.19       | TG(40:2)                        | C <sub>43</sub> H <sub>80</sub> O <sub>6</sub>  | 708.6142                                         | 708.6133                                          | -1.21               | 409.331; 603.535; 575.503; 411.347; 435.347; 437.363                   |
| 206 | 25.34       | TG(36:0)                        | C <sub>39</sub> H <sub>74</sub> O <sub>6</sub>  | 656.5829                                         | 656.5826                                          | -0.49               | 383.315; 551.504; 411.347; 355.284; 523.472                            |
| 207 | 25.62       | TG(40:1)                        | C <sub>43</sub> H <sub>80</sub> O <sub>6</sub>  | 710.6299                                         | 710.6296                                          | -0.45               | 411.347; 437.363; 577.519; 465.394; 409.331; 439.378                   |
| 208 | 25.67       | TG(42:2)                        | C <sub>45</sub> H <sub>86</sub> O <sub>6</sub>  | 736.6455                                         | 736.645                                           | -0.65               | 437.363; 603.535; 491.410; 439.379; 549.488; 575.504; 465.394          |
| 209 | 26.16       | TG(44:2)                        | C <sub>47</sub> H <sub>86</sub> O <sub>6</sub>  | 764.6768                                         | 764.6762                                          | -0.77               | 465.394; 575.503; 491.409; 603.534; 467.411; 577.518; 493.426          |
| 210 | 26.17       | TG(42:1)                        | C <sub>43</sub> H <sub>84</sub> O <sub>6</sub>  | 738.6612                                         | 738.6602                                          | -1.33               | 439.378; 465.394; 577.519; 549.487                                     |
| 211 | 26.18       | TG(40:0)                        | C <sub>43</sub> H <sub>80</sub> O <sub>6</sub>  | 712.6455                                         | 712.6447                                          | -1.19               | 439.378; 411.347; 467.410; 579.534; 523.472                            |
| 212 | 26.22       | TG(38:1)                        | C <sub>41</sub> H <sub>78</sub> O <sub>6</sub>  | 682.5986                                         | 682.5975                                          | -1.65               | 383.315; 409.331; 577.519; 411.347; 549.488; 437.363                   |
| 213 | 26.22       | TG(40:1)                        | C <sub>43</sub> H <sub>80</sub> O <sub>6</sub>  | 710.6299                                         | 710.6288                                          | -1.48               | 411.347; 437.362; 409.331; 577.519; 439.378; 605.549                   |
| 214 | 26.23       | TG(38:0)                        | C <sub>41</sub> H <sub>78</sub> O <sub>6</sub>  | 684.6142                                         | 684.6135                                          | -1.07               | 411.347; 383.315; 551.503; 579.534; 439.380; 495.442; 467.416          |
| 215 | 26.26       | TG(36:0)                        | C <sub>39</sub> H <sub>74</sub> O <sub>6</sub>  | 656.5829                                         | 656.5823                                          | -0.86               | 383.316; 551.503; 411.347; 355.284; 523.472                            |
| 216 | 26.56       | TG(42:0)                        | C <sub>43</sub> H <sub>86</sub> O <sub>6</sub>  | 740.6768                                         | 740.6761                                          | -0.96               | 467.410; 495.441; 523.472; 551.503; 439.379                            |
| 217 | 26.57       | TG(44:1)                        | C <sub>47</sub> H <sub>88</sub> O <sub>6</sub>  | 766.6925                                         | 766.6916                                          | -1.19               | 467.410; 521.456; 493.426; 549.488; 577.519                            |
| 218 | 26.58       | TG(46:2)                        | C <sub>49</sub> H <sub>90</sub> O <sub>6</sub>  | 792.7081                                         | 792.7072                                          | -1.19               | 493.426; 603.535; 547.472; 549.488; 521.457; 575.504                   |
| 219 | 26.66       | TG(48:3)                        | C <sub>51</sub> H <sub>96</sub> O <sub>6</sub>  | 818.7238                                         | 818.7225                                          | -1.55               | 519.441; 521.457; 547.472; 601.518; 545.456; 575.503; 573.488          |
| 220 | 26.67       | TG(50:4)                        | C <sub>53</sub> H <sub>94</sub> O <sub>6</sub>  | 844.7394                                         | 844.7392                                          | -0.24               | 547.472; 575.503; 573.488; 571.472; 599.503                            |
| 221 | 26.74       | TG(54:6)                        | C <sub>57</sub> H <sub>98</sub> O <sub>6</sub>  | 896.7707                                         | 896.7699                                          | -0.89               | 599.503; 551.503; 577.519; 601.518; 597.488                            |
| 222 | 26.77       | TG(52:5)                        | C <sub>53</sub> H <sub>96</sub> O <sub>6</sub>  | 870.7551                                         | 870.7545                                          | -0.67               | 575.503; 573.487; 597.487                                              |
| 223 | 26.97       | TG(46:1)                        | C <sub>49</sub> H <sub>92</sub> O <sub>6</sub>  | 794.7238                                         | 794.7231                                          | -0.82               | 495.441; 521.456; 549.487; 577.519; 493.425; 605.550; 523.472          |
| 224 | 26.98       | TG(48:2)                        | C <sub>51</sub> H <sub>94</sub> O <sub>6</sub>  | 820.7394                                         | 820.7386                                          | -0.99               | 521.457; 549.488; 603.535; 547.472; 575.503; 577.519;                  |
| 225 | 26.98       | TG(44:0)                        | C <sub>47</sub> H <sub>86</sub> O <sub>6</sub>  | 768.7081                                         | 768.7074                                          | -0.91               | 495.441; 523.472; 551.503; 467.412; 509.457; 579.532                   |
| 226 | 27.01       | TG(50:3)                        | C <sub>53</sub> H <sub>96</sub> O <sub>6</sub>  | 846.7551                                         | 846.754                                           | -1.34               | 575.503; 549.487; 547.472; 573.488; 601.519; 603.533                   |
| 227 | 27.03       | TG(54:5)                        | C <sub>57</sub> H <sub>100</sub> O <sub>6</sub> | 898.7864                                         | 898.7843                                          | -2.33               | 599.503; 601.519; 551.503                                              |
| 228 | 27.04       | TG(52:4)                        | C <sub>53</sub> H <sub>98</sub> O <sub>6</sub>  | 872.7707                                         | 872.7702                                          | -0.57               | 575.503; 599.503; 573.487; 601.518                                     |
| 229 | 27.35       | TG(48:1)                        | C <sub>51</sub> H <sub>96</sub> O <sub>6</sub>  | 822.7551                                         | 822.7539                                          | -1.45               | 523.472; 549.487; 577.519; 521.456; 551.503; 605.550                   |
| 230 | 27.35       | TG(50:2)                        | C <sub>53</sub> H <sub>98</sub> O <sub>6</sub>  | 848.7707                                         | 848.7695                                          | -1.45               | 549.487; 603.534; 575.503; 577.519; 551.502; 563.501                   |
| 231 | 27.38       | TG(46:0)                        | C <sub>49</sub> H <sub>90</sub> O <sub>6</sub>  | 796.7394                                         | 796.7386                                          | -0.94               | 523.472; 551.503; 495.440; 579.534; 537.488                            |
| 232 | 27.38       | TG(52:3)                        | C <sub>53</sub> H <sub>100</sub> O <sub>6</sub> | 874.7864                                         | 874.7855                                          | -1                  | 575.503; 603.534; 577.518; 601.518                                     |
| 233 | 27.38       | TG(54:4)                        | C <sub>57</sub> H <sub>102</sub> O <sub>6</sub> | 900.802                                          | 900.8015                                          | -0.61               | 601.518; 603.534; 599.503; 605.550                                     |
| 234 | 27.72       | TG(52:2)                        | C <sub>53</sub> H <sub>100</sub> O <sub>6</sub> | 876.802                                          | 876.8011                                          | -0.97               | 577.519; 603.535; 575.503; 579.535; 605.549                            |
| 235 | 27.73       | TG(48:1)                        | C <sub>51</sub> H <sub>96</sub> O <sub>6</sub>  | 822.7551                                         | 822.754                                           | -1.38               | 523.472; 549.488; 577.519; 551.503; 521.457; 579.534                   |
| 236 | 27.73       | TG(50:1)                        | C <sub>53</sub> H <sub>100</sub> O <sub>6</sub> | 850.7864                                         | 850.7855                                          | -1.1                | 577.519; 551.503; 549.488; 605.550; 579.533                            |
| 237 | 27.73       | TG(54:3)                        | C <sub>57</sub> H <sub>106</sub> O <sub>6</sub> | 902.8177                                         | 902.8167                                          | -1.09               | 603.535                                                                |
| 238 | 27.75       | TG(48:0)                        | C <sub>51</sub> H <sub>98</sub> O <sub>6</sub>  | 824.7707                                         | 824.7696                                          | -1.34               | 551.503; 523.472; 579.534; 607.566; 565.519                            |
| 239 | 28.05       | TG(56:3)                        | C <sub>59</sub> H <sub>108</sub> O <sub>6</sub> | 930.849                                          | 930.8497                                          | 0.72                | 631.566; 603.534; 633.582; 601.518; 629.554                            |
| 240 | 28.06       | TG(54:2)                        | C <sub>57</sub> H <sub>106</sub> O <sub>6</sub> | 904.8333                                         | 904.8323                                          | -1.06               | 605.550; 603.534; 607.565; 631.565; 577.520                            |
| 241 | 28.07       | TG(52:1)                        | C <sub>53</sub> H <sub>106</sub> O <sub>6</sub> | 878.8177                                         | 878.8166                                          | -1.26               | 579.534; 577.519; 605.550; 607.564                                     |
| 242 | 28.1        | TG(50:1)                        | C <sub>53</sub> H <sub>100</sub> O <sub>6</sub> | 850.7864                                         | 850.7854                                          | -1.17               | 577.519; 551.503; 549.488; 605.549; 579.533                            |
| 243 | 28.11       | TG(50:0)                        | C <sub>53</sub> H <sub>102</sub> O <sub>6</sub> | 852.802                                          | 852.801                                           | -1.14               | 579.535; 551.503; 607.565; 565.519; 523.471                            |
| 244 | 28.44       | TG(56:2)                        | C <sub>59</sub> H <sub>110</sub> O <sub>6</sub> | 932.8646                                         | 932.8632                                          | -1.48               | 633.581; 577.519; 603.534; 659.597; 605.550; 631.566                   |
| 245 | 28.46       | TG(54:1)                        | C <sub>57</sub> H <sub>108</sub> O <sub>6</sub> | 906.849                                          | 906.8478                                          | -1.35               | 605.550; 607.564; 633.581; 577.519                                     |
| 246 | 28.48       | TG(52:0)                        | C <sub>53</sub> H <sub>106</sub> O <sub>6</sub> | 880.8333                                         | 880.8328                                          | -0.61               | 579.535; 607.565; 551.503                                              |
| 247 | 28.48       | TG(52:1)                        | C <sub>53</sub> H <sub>106</sub> O <sub>6</sub> | 878.8177                                         | 878.8159                                          | -2.03               | 579.534; 577.519; 605.550; 607.565; 551.503                            |
| 248 | 28.48       | TG(52:2)                        | C <sub>53</sub> H <sub>106</sub> O <sub>6</sub> | 876.802                                          | 876.8008                                          | -1.32               | 577.519; 603.535; 575.503; 579.533; 605.549                            |

|     |       |          |                                                 |          |          |       |                                             |
|-----|-------|----------|-------------------------------------------------|----------|----------|-------|---------------------------------------------|
| 249 | 28.87 | TG(56:1) | C <sub>59</sub> H <sub>112</sub> O <sub>6</sub> | 934.8803 | 934.879  | -1.42 | 635.597; 661.612; 577.519; 633.582; 605.550 |
| 250 | 28.9  | TG(54:0) | C <sub>57</sub> H <sub>110</sub> O <sub>6</sub> | 908.8646 | 908.8634 | -1.32 | 607.565; 635.597; 609.572; 579.534; 551.503 |
| 251 | 29.61 | TG(56:0) | C <sub>59</sub> H <sub>114</sub> O <sub>6</sub> | 936.8959 | 936.8953 | -0.61 | 663.628; 635.597; 551.503; 579.535; 607.566 |
| 252 | 29.74 | TG(58:1) | C <sub>61</sub> H <sub>118</sub> O <sub>6</sub> | 962.9116 | 962.9108 | -0.86 | 663.628; 577.519; 689.644; 661.612; 963.915 |
| 253 | 29.94 | TG(58:0) | C <sub>61</sub> H <sub>118</sub> O <sub>6</sub> | 964.9272 | 964.9265 | -0.77 | 663.628; 691.660; 579.535; 607.566          |

**Table S8.** Retention time (Rt, min), proposed formula, theoretical  $m/z$  value of the precursor ion (Da), experimental  $m/z$  value of the precursor ion (Da), accuracy ( $\Delta m$ , ppm),  $m/z$  values of diagnostic fragment ions (Da) of compounds identified as amino acids, peptides and other nitrogen compounds in aqueous spirulina extracts with the use of LC-Q-Orbitrap HRMS in positive ion mode.

| No  | Rt [min] | Compound                | Formula                                                                      | Theoretical [M+H] <sup>+</sup> | Experimental [M+H] <sup>+</sup> | $\Delta m$ [ppm] | MS/MS                                                             | Reference                             |
|-----|----------|-------------------------|------------------------------------------------------------------------------|--------------------------------|---------------------------------|------------------|-------------------------------------------------------------------|---------------------------------------|
| 254 | 1.57     | Spermidine              | C <sub>8</sub> H <sub>19</sub> N <sub>3</sub>                                | 146.1657                       | 146.1652                        | 0.22             | 72.082; 84.0815; 58.066; 112.112                                  | MSBNK-Keio_Univ-KO003974              |
| 255 | 1.64     | Lys                     | C <sub>6</sub> H <sub>14</sub> N <sub>2</sub> O <sub>2</sub>                 | 147.1133                       | 147.1128                        | 0.16             | 84.081; 55.055                                                    | MSBNK-Antwerp_Univ-METOX_P100301_FB57 |
| 256 | 1.67     | Ala-Lys                 | C <sub>9</sub> H <sub>19</sub> N <sub>3</sub> O <sub>3</sub>                 | 218.1505                       | 218.1499                        | -0.12            | 84.081; 56.050; 67.055; 130.086                                   | MSBNK-Keio_Univ-KO002291              |
| 257 | 1.69     | His                     | C <sub>6</sub> H <sub>9</sub> N <sub>3</sub> O <sub>2</sub>                  | 156.0773                       | 156.0769                        | 0.56             | 83.061; 93.045; 110.072; 82.053; 68.050; 95.061                   | MSBNK-BGC_Munich-RP002003             |
| 258 | 1.70     | Lys(me2)                | C <sub>8</sub> H <sub>18</sub> N <sub>2</sub> O <sub>2</sub>                 | 175.1446                       | 175.1441                        | 0.11             | 70.066; 84.081; 72.081; 56.050; 130.098; 68.050                   | HMDB0341183                           |
| 259 | 1.72     | Agmatine                | C <sub>5</sub> H <sub>14</sub> N <sub>4</sub>                                | 131.1297                       | 131.1292                        | 0.83             | 72.082; 60.056; 55.055; 97.076                                    | MSBNK-Keio_Univ-KO002256              |
| 260 | 1.73     | Gln                     | C <sub>5</sub> H <sub>10</sub> N <sub>2</sub> O <sub>3</sub>                 | 147.0769                       | 147.0765                        | 0.41             | 84.045; 56.050                                                    | MSBNK-IPB_Halle-PB000468              |
| 261 | 1.74     | Arg                     | C <sub>6</sub> H <sub>14</sub> N <sub>4</sub> O <sub>2</sub>                 | 175.1195                       | 175.1190                        | 0.19             | 70.066; 60.056; 71.050; 72.081                                    | MSBNK-IPB_Halle-PB000421              |
| 262 | 1.76     | Glu                     | C <sub>5</sub> H <sub>9</sub> NO <sub>4</sub>                                | 148.0610                       | 148.0604                        | 0.11             | 84.045; 56.050                                                    | MSBNK-BGC_Munich-RP001403             |
| 263 | 1.77     | Ser-Arg                 | C <sub>9</sub> H <sub>19</sub> N <sub>3</sub> O <sub>4</sub>                 | 262.1515                       | 262.1509                        | -0.48            | 70.066; 60.045; 116.071; 60.056; 158.092; 175.119; 72.082         | HMDB0029033                           |
| 264 | 1.78     | Arg-Asn                 | C <sub>10</sub> H <sub>21</sub> N <sub>5</sub> O <sub>4</sub>                | 289.1624                       | 289.1617                        | -0.60            | 70.065; 115.087; 60.056                                           | HMDB0028704                           |
| 265 | 1.79     | Arg-Gly                 | C <sub>8</sub> H <sub>17</sub> N <sub>3</sub> O <sub>3</sub>                 | 232.1410                       | 232.1404                        | -0.30            | 70.066; 116.071; 60.056; 112.087; 72.081; 115.087; 100.051        | HMDB0028709                           |
| 266 | 1.84     | Methionine sulfoxide    | C <sub>5</sub> H <sub>11</sub> NO <sub>2</sub> S                             | 166.0538                       | 166.0533                        | 0.16             | 56.050; 74.024; 75.027; 102.055                                   | HMDB0002005                           |
| 267 | 1.95     | Gln-Ala                 | C <sub>8</sub> H <sub>15</sub> N <sub>3</sub> O <sub>4</sub>                 | 218.1141                       | 218.1135                        | -0.25            | 84.045; 83.061; 56.050; 101.071                                   | HMDB0028790                           |
| 268 | 2.00     | N8-Acetylspermidine     | C <sub>9</sub> H <sub>21</sub> N <sub>3</sub> O                              | 188.1763                       | 188.1757                        | -0.08            | 84.081; 58.066; 72.081; 114.092;                                  | HMDB0002189                           |
| 269 | 2.14     | Val-His                 | C <sub>11</sub> H <sub>18</sub> N <sub>4</sub> O <sub>3</sub>                | 255.1457                       | 255.145                         | -0.77            | 110.072; 72.0815; 57.034; 156.077; 55.055                         | HMDB0029129                           |
| 270 | 2.22     | Thr-Gln                 | C <sub>9</sub> H <sub>17</sub> N <sub>3</sub> O <sub>3</sub>                 | 248.1246                       | 248.124                         | -0.37            | 84.045; 74.061; 56.050; 60.056; 114.103                           | HMDB0029059                           |
| 271 | 2.27     | Cytidine diphosphate    | C <sub>8</sub> H <sub>15</sub> N <sub>3</sub> O <sub>11</sub> P <sub>2</sub> | 404.0260                       | 404.0253                        | -0.36            | 112.051; 97.029                                                   | HMDB0001546                           |
| 272 | 2.31     | Asn-Val                 | C <sub>9</sub> H <sub>17</sub> N <sub>3</sub> O <sub>4</sub>                 | 232.1297                       | 232.1291                        | -0.82            | 72.081; 55.055; 141.000; 70.066; 87.056                           | HMDB0028744                           |
| 273 | 2.36     | L-Ergothioneine         | C <sub>9</sub> H <sub>15</sub> N <sub>3</sub> O <sub>2</sub> S               | 230.0963                       | 230.0959                        | 0.21             | 127.033; 69.058; 60.082; 68.050; 100.022; 67.042                  | MSBNK-MSSJ-MSJ00864                   |
| 274 | 2.39     | Val-Lys                 | C <sub>11</sub> H <sub>21</sub> N <sub>3</sub> O <sub>3</sub>                | 246.1818                       | 246.1811                        | -0.40            | 72.081; 130.086; 55.055; 129.102; 147.113                         | HMDB0029132                           |
| 275 | 2.49     | His-Pro                 | C <sub>11</sub> H <sub>16</sub> N <sub>4</sub> O <sub>3</sub>                | 253.1301                       | 253.1294                        | -0.55            | 110.072; 83.061; 93.045; 70.066; 116.071; 156.078                 | HMDB0028893                           |
| 276 | 2.57     | Arg-Val                 | C <sub>11</sub> H <sub>23</sub> N <sub>3</sub> O <sub>3</sub>                | 274.1879                       | 274.1873                        | -0.42            | 72.082; 70.066; 60.056; 175.119; 55.055; 112.087                  | HMDB0028722                           |
| 277 | 2.59     | Pro-Gly                 | C <sub>7</sub> H <sub>12</sub> N <sub>2</sub> O <sub>3</sub>                 | 173.0926                       | 173.0921                        | 0.30             | 70.066; 68.050; 116.071; 53.003                                   | HMDB0011178                           |
| 278 | 2.82     | Gln-Val                 | C <sub>10</sub> H <sub>19</sub> N <sub>3</sub> O <sub>4</sub>                | 246.1454                       | 246.1448                        | -0.39            | 72.082; 130.050; 55.055                                           | HMDB0028832                           |
| 279 | 2.86     | Met                     | C <sub>5</sub> H <sub>11</sub> NO <sub>2</sub> S                             | 150.0589                       | 150.0584                        | 0.55             | 74.024; 87.027; 102.055                                           | MSBNK-BGC_Munich-RP001902             |
| 280 | 3.14     | Lys-Leu                 | C <sub>12</sub> H <sub>23</sub> N <sub>3</sub> O <sub>3</sub>                | 260.1974                       | 260.1968                        | -0.30            | 84.081; 86.097; 129.102                                           | HMDB0028955                           |
| 281 | 3.20     | L-Glutathione (reduced) | C <sub>10</sub> H <sub>17</sub> N <sub>3</sub> O <sub>6</sub> S              | 308.0916                       | 308.091                         | -0.23            | 116.017; 162.022                                                  | MSBNK-NAIST-KNA00122                  |
| 282 | 3.21     | His-Leu                 | C <sub>12</sub> H <sub>20</sub> N <sub>4</sub> O <sub>3</sub>                | 269.1614                       | 269.1607                        | -0.37            | 110.072; 156.077; 95.061; 69.071; 83.061; 93.045                  | HMDB0028889                           |
| 283 | 3.33     | Met-Arg                 | C <sub>11</sub> H <sub>23</sub> N <sub>5</sub> O <sub>2</sub> S              | 306.1599                       | 306.1593                        | -0.37            | 104.053; 56.050; 60.056; 116.071; 61.011; 112.087                 | HMDB0028967                           |
| 284 | 3.34     | Leu-Gly                 | C <sub>8</sub> H <sub>16</sub> N <sub>2</sub> O <sub>3</sub>                 | 189.1239                       | 189.1234                        | -0.01            | 55.055; 57.058; 70.066                                            | HMDB0028929                           |
| 285 | 3.50     | Niacin (vit. B3)        | C <sub>6</sub> H <sub>5</sub> NO <sub>2</sub>                                | 124.0399                       | 124.0395                        | 1.57             | 80.050; 53.039; 124.039; 52.019; 97.048                           | HMDB0001488                           |
| 286 | 3.53     | Ala-Pro                 | C <sub>8</sub> H <sub>14</sub> N <sub>2</sub> O <sub>3</sub>                 | 187.1083                       | 187.1077                        | -0.1             | 70.066; 116.071; 55.055; 84.045                                   | HMDB0028695                           |
| 287 | 3.60     | Cytidine                | C <sub>9</sub> H <sub>13</sub> N <sub>3</sub> O <sub>4</sub>                 | 244.0933                       | 244.0927                        | -0.31            | 112.051                                                           | HMDB0000089                           |
| 288 | 3.61     | Gln-Pro                 | C <sub>10</sub> H <sub>17</sub> N <sub>3</sub> O <sub>4</sub>                | 244.1297                       | 244.1291                        | -0.27            | 70.066; 84.045; 83.061; 116.071                                   | HMDB0028805                           |
| 289 | 3.77     | Guanine                 | C <sub>5</sub> H <sub>5</sub> N <sub>5</sub> O                               | 152.0572                       | 152.0568                        | 0.28             | 110.035; 55.030; 107.036; 135.030                                 | MSBNK-Antwerp_Univ-METOX_P100706_EF88 |
| 290 | 3.83     | Arg-Ile                 | C <sub>12</sub> H <sub>23</sub> N <sub>5</sub> O <sub>3</sub>                | 288.2035                       | 288.2029                        | -0.35            | 86.097; 70.066; 60.056; 69.071; 112.087; 72.082                   | HMDB0028712                           |
| 291 | 3.83     | Leu/Ile                 | C <sub>8</sub> H <sub>15</sub> NO <sub>2</sub>                               | 132.1024                       | 132.102                         | 0.75             | 53.003; 86.097; 55.055; 69.071; 57.058; 56.050                    | MSBNK-IPB_Halle-PB000398              |
| 292 | 3.93     | Ser-Met                 | C <sub>8</sub> H <sub>16</sub> N <sub>2</sub> O <sub>2</sub> S               | 237.0909                       | 237.0903                        | -0.23            | 60.045; 56.050; 104.053; 61.011; 133.032; 102.055; 84.045; 87.027 | HMDB0029045                           |
| 293 | 3.96     | Hpro-Arg                | C <sub>11</sub> H <sub>21</sub> N <sub>5</sub> O <sub>4</sub>                | 288.1672                       | 288.1666                        | -0.17            | 70.066; 175.119; 116.071; 60.056; 158.092; 86.061                 | HMDB0028857                           |
| 294 | 4.02     | Adenine                 | C <sub>5</sub> H <sub>5</sub> N <sub>5</sub>                                 | 136.0623                       | 136.0617                        | -0.46            | 119.035                                                           | MSBNK-RIKEN-PR100020                  |
| 295 | 4.04     | $\gamma$ -Glu-Val       | C <sub>10</sub> H <sub>18</sub> N <sub>2</sub> O <sub>3</sub>                | 247.1294                       | 247.1288                        | -0.15            | 84.045; 72.081; 55.055; 56.050; 130.050; 118.086                  | HMDB0011172                           |
| 296 | 4.04     | Lys-Phe                 | C <sub>15</sub> H <sub>21</sub> N <sub>3</sub> O <sub>3</sub>                | 294.1818                       | 294.1812                        | -1.35            | 84.0814; 120.081; 129.102; 56.050                                 | HMDB0028958                           |
| 297 | 4.05     | Guanosine monophosphate | C <sub>10</sub> H <sub>14</sub> N <sub>5</sub> O <sub>8</sub> P              | 364.0658                       | 364.0652                        | -0.16            | 152.057                                                           | HMDB0001397                           |
| 298 | 4.07     | Hypoxanthine            | C <sub>5</sub> H <sub>4</sub> NaO                                            | 137.0463                       | 137.0458                        | 0.37             | 55.030; 110.035; 82.041; 137.046; 94.041; 67.030                  | HMDB0014581                           |
| 299 | 4.16     | Val-Met                 | C <sub>10</sub> H <sub>20</sub> N <sub>2</sub> O <sub>2</sub> S              | 249.1273                       | 249.1267                        | -0.11            | 72.082; 55.055; 56.050; 104.053; 61.011; 57.058                   | HMDB0259742                           |
| 300 | 4.17     | Phe                     | C <sub>9</sub> H <sub>9</sub> NO <sub>2</sub>                                | 166.0868                       | 166.0863                        | 0.45             | 103.055; 120.081; 91.055; 95.050; 79.055; 93.070                  | MSBNK-BGC_Munich-RP000403             |
| 301 | 4.25     | 2'-Deoxyadenosine       | C <sub>10</sub> H <sub>13</sub> N <sub>5</sub> O <sub>3</sub>                | 252.1096                       | 252.1091                        | -0.15            | 136.062; 73.029; 99.044                                           | HMDB0000101                           |
| 302 | 4.50     | Gln-Leu                 | C <sub>11</sub> H <sub>21</sub> N <sub>3</sub> O <sub>4</sub>                | 260.1610                       | 260.1605                        | -0.05            | 84.045; 86.097; 83.061; 56.050; 132.102; 101.071; 129.066         | HMDB0028801                           |
| 303 | 4.57     | Ala-Leu                 | C <sub>9</sub> H <sub>18</sub> N <sub>2</sub> O <sub>3</sub>                 | 203.1396                       | 203.1391                        | 0.37             | 86.097; 132.102; 69.071; 72.081                                   | HMDB0028691                           |
| 304 | 4.58     | Thr-Leu                 | C <sub>10</sub> H <sub>20</sub> N <sub>2</sub> O <sub>4</sub>                | 233.1501                       | 233.1495                        | -0.23            | 74.061; 56.050; 86.097; 57.034; 58.066                            | HMDB0259044                           |
| 305 | 4.75     | Leu-Pro                 | C <sub>11</sub> H <sub>20</sub> N <sub>3</sub> O <sub>3</sub>                | 229.1552                       | 229.1547                        | 0.05             | 70.066; 86.097; 69.071                                            | HMDB0011175                           |

|     |      |                          |                                                               |          |          |       |                                                            |                                      |
|-----|------|--------------------------|---------------------------------------------------------------|----------|----------|-------|------------------------------------------------------------|--------------------------------------|
| 306 | 4.88 | Phe-Gln                  | C <sub>14</sub> H <sub>19</sub> N <sub>3</sub> O <sub>4</sub> | 294.1454 | 294.1448 | -0.25 | 120.081; 84.045; 166.086; 56.050                           | HMDB0028993                          |
| 307 | 4.92 | Phe-Gly                  | C <sub>11</sub> H <sub>14</sub> N <sub>2</sub> O <sub>3</sub> | 223.1083 | 223.1077 | 0.08  | 120.081; 103.055; 107.050; 91.055; 79.055                  | HMDB0028995                          |
| 308 | 5.03 | Ala-Phe                  | C <sub>12</sub> H <sub>16</sub> N <sub>2</sub> O <sub>3</sub> | 237.1239 | 237.1233 | -0.15 | 120.081; 121.084; 103.055; 107.049; 93.070; 91.054; 79.055 | HMDB0028694                          |
| 309 | 5.09 | Trp                      | C <sub>11</sub> H <sub>12</sub> N <sub>2</sub> O <sub>2</sub> | 205.0977 | 205.0973 | 0.35  | 118.065; 143.073; 132.081; 115.055; 144.081; 142.065       | MSBNK-Washington_State_Univ-BML01197 |
| 310 | 5.30 | Val-Leu                  | C <sub>11</sub> H <sub>22</sub> N <sub>2</sub> O <sub>3</sub> | 231.1709 | 231.1703 | -0.18 | 72.081; 55.055; 57.058                                     | HMDB0029131                          |
| 311 | 5.33 | Thiamine (vit. B1)       | C <sub>12</sub> H <sub>16</sub> N <sub>4</sub> OS             | 265.1123 | 265.1117 | -0.3  | 122.071; 81.045                                            | HMDB0000235                          |
| 312 | 5.68 | γ-Glu-Leu                | C <sub>11</sub> H <sub>20</sub> N <sub>2</sub> O <sub>3</sub> | 261.1451 | 261.1445 | -0.02 | 84.045; 86.097; 142.050; 130.050; 114.055                  | HMDB0011171                          |
| 313 | 6.58 | Trp-Val                  | C <sub>16</sub> H <sub>21</sub> N <sub>3</sub> O <sub>3</sub> | 304.1661 | 304.1655 | -0.48 | 72.081; 146.060; 55.055; 159.092; 144.081                  | HMDB0029096                          |
| 314 | 7.19 | Leu-Phe                  | C <sub>15</sub> H <sub>22</sub> N <sub>2</sub> O <sub>3</sub> | 279.1709 | 279.1703 | -0.66 | 86.097; 69.071; 120.081; 70.074; 57.058; 166.087           | HMDB0013243                          |
| 315 | 7.43 | Leu-Trp                  | C <sub>17</sub> H <sub>23</sub> N <sub>3</sub> O <sub>3</sub> | 318.1818 | 318.1812 | -0.13 | 86.097; 69.071; 87.100; 159.092; 144.080                   | HMDB0028940                          |
| 316 | 9.35 | Indolo-3-carboxyaldehyde | C <sub>8</sub> H <sub>7</sub> NO                              | 146.0606 | 146.0601 | 0.40  | 91.055; 117.057; 118.0658; 65.039; 90.047; 89.039          | HMDB0029737                          |

Ala, alanine; Arg, arginine; Asn, asparagine; Gln, glutamine; Glu, glutamic acid; Gly, glycine; His, histidine; Hpro, hydroxyproline; Ile, isoleucine; Leu, leucine; Lys, lysine; Met, methionine; Phe, phenylalanine; Pro, proline; Ser, serine; Thr, threonine; Trp, tryptophan; Val, Valine.
